# Supplementary material for: Fluorescence polarization immunoassay for the determination of diclofenac in wastewater
Source: PubMed Central journal article supplement (PMC7813709; doi:10.1007/s00216-020-03058-w), 2020-11-25
Supplement: 216_2020_3058_MOESM1_ESM.pdf [file 216_2020_3058_MOESM1_ESM.pdf]

## **Analytical and Bioanalytical Chemistry**

### **Electronic Supplementary Material**

#### **Fluorescence polarization immunoassay for the determination of diclofenac in wastewater**

Anna Raysyan, Robin Moerer, Bianca Coesfeld, Sergei A. Eremin, Rudolf J. Schneider

## Synthesis of fluorophore-labeled diclofenac derivatives (tracers)

Three homologous fluorescent tracers to build a fluorescence polarization immunoassay for diclofenac (DCF), DCF-AMF, DCF-Ahx-AMF, DCF-Ahx-EDF, and one heterologous tracer, 5-OH-DCF-AMF, were synthesized.

DCF-Ahx (diclofenac aminohexanoic acid amide) was previously synthesized, the synthesis is described in Schmidt et al. (2017) [1]. 5-Hydroxy diclofenac (5-OH-DCF) is a commercially available metabolite of DCF.

The tracers were obtained by activation of the carboxyl group contained in the compounds DCF, DCF-Ahx, and 5-OH-DCF-AMF, and coupled with the free amino group of the respective fluorescein derivatives, 4'-(aminomethyl)fluorescein (AMF) and ethylenediamine fluoresceinthiocarbamyl (EDF) via the activated ester method with NHS/DCC [2] (see **Figs. S1-S3**). EDF was synthesized from fluorescein isothiocyanate (FITC) and ethylenediamine dihydrochloride following the method proposed by Pourfarzaneh et al. (1980) [3]. All syntheses were carried out under Argon and for most of the time in the dark.

For DCF-AMF (Fig. S1), 4.79 mg (16  $\mu\text{mol}$ , 1 eq) of DCF were dissolved in 200  $\mu\text{L}$  abs. *N,N*-dimethylformamide (DMF). 5.85 mg (51  $\mu\text{mol}$ , 3.2 eq) of *N*-hydroxysuccinimide (NHS) and 8.90 mg (41  $\mu\text{mol}$ , 2.6 eq) of *N,N'*-dicyclohexylcarbodiimide (DCC) were each dissolved in 150  $\mu\text{L}$  of abs DMF and added to the DCF solution. The mixture was incubated overnight at room temperature under stirring. 60  $\mu\text{L}$  of the solution containing the diclofenac NHS ester were added to 1.05 mg (2.6  $\mu\text{mol}$ ) AMF•HCl dissolved in 10  $\mu\text{L}$  of triethylamine.

Syntheses of the other tracers were performed accordingly. For the synthesis of DCF-Ahx-AMF (Fig. S2a) and DCF-Ahx-EDF (Fig. S2b), 23 mg (200  $\mu\text{mol}$ ) of NHS and 41 mg DCC (200  $\mu\text{mol}$ ) were each dissolved in 2000  $\mu\text{L}$  DMF. 3 mg (6,7  $\mu\text{mol}$ , 1 eq) of DCF-Ahx was dissolved in a mixture of each 200  $\mu\text{L}$  (20  $\mu\text{mol}$ , 3 eq) of the NHS and DCC solutions, and incubated for 3 h at room temperature under stirring. 200  $\mu\text{L}$  (< 3.3  $\mu\text{mol}$ ) aliquots of the solution containing the DCF-Ahx NHS ester were added to a) AMF•HCl (2.6  $\mu\text{mol}$ ) or b) EDF•HCl (2.2  $\mu\text{mol}$ ), respectively, dissolved in 10  $\mu\text{L}$  of triethylamine.

For the heterologous tracer, the active ester was produced from 5-hydroxy diclofenac (Fig. S3). 5.22 mg (17  $\mu\text{mol}$ , 1 eq) of 5-OH-DCF was dissolved in 200  $\mu\text{L}$  abs DMF. 5.85 mg (51  $\mu\text{mol}$ , 3 eq) NHS and 9 mg DCC (43  $\mu\text{mol}$ , 2.5 eq) were dissolved in 250  $\mu\text{L}$  abs DMF each and added to the 5-OH-DCF solution. The mixture was incubated overnight under stirring. 50  $\mu\text{L}$  of the solution containing the 5-OH-DCF NHS ester formed (< 1  $\mu\text{mol}$ ) were added to 1.18 mg AMF•HCl (3  $\mu\text{mol}$ ) diluted in 10  $\mu\text{L}$  of triethylamine.

All products formed a yellow-orange solution which was stirred for another 4 h before being purified by thin-layer chromatography (TLC).

TLC was performed on silica sheets (2.5 x 7.5 cm; silica gel 60 with concentration zone/without fluorescence indicator, Merck). The mobile phase was  $\text{CHCl}_3:\text{CH}_3\text{OH}:\text{CH}_3\text{COOH}$  (4:1:0.1, v/v). For each tracer, the main yellow band, clearly visible under UV light ( $\lambda = 365 \text{ nm}$ ), was collected, dissolved in ethanol, stripped from silica via filtration through a Teflon membrane syringe filter with a pore size of 0.45  $\mu\text{m}$  and 17 mm

in diameter, and purified again by TLC (see retardation factors  $R_f$  in Table S1). Ethanol as solvent was evaporated, the residue finally dissolved in 100  $\mu$ L methanol, stored at 4 °C and later on directly used as tracer stock solution from which dilutions (Tracer Working Solutions) in borate buffer were prepared.

The success of the synthesis was confirmed by LC-MS/MS (see Fig. S4). Mass spectra were recorded at the retention time of the largest peak in the UV trace.  $m/z + 1$  and  $+Na^+$  adduct ions for each individual synthesis product could be identified. The chromatograms showed for some compounds not a high purity, but impurities rarely interfere with FPIA analysis, thus the products were used as obtained.

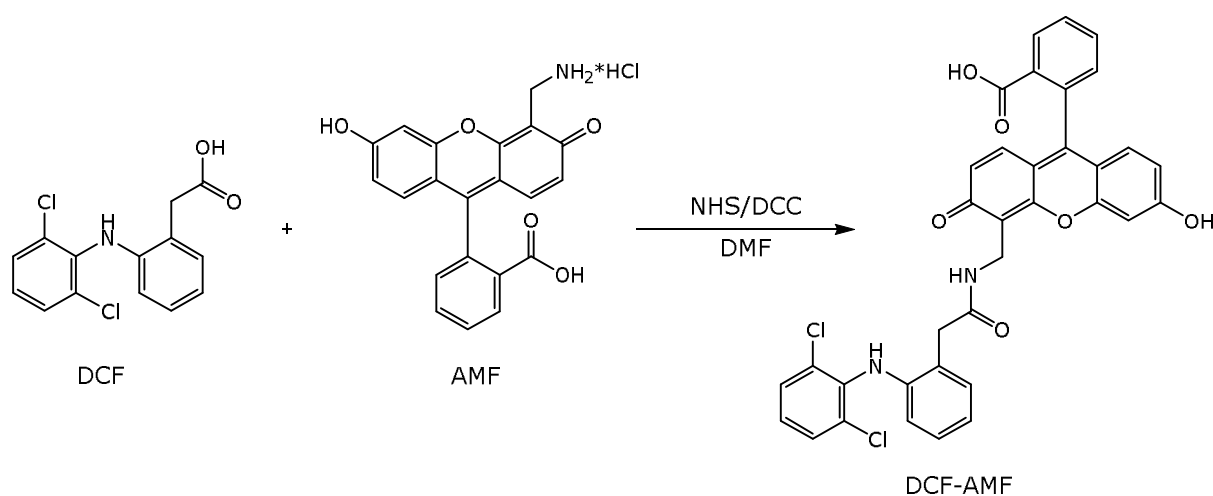

**Fig. S1** Reaction scheme for the synthesis of DCF-AMF

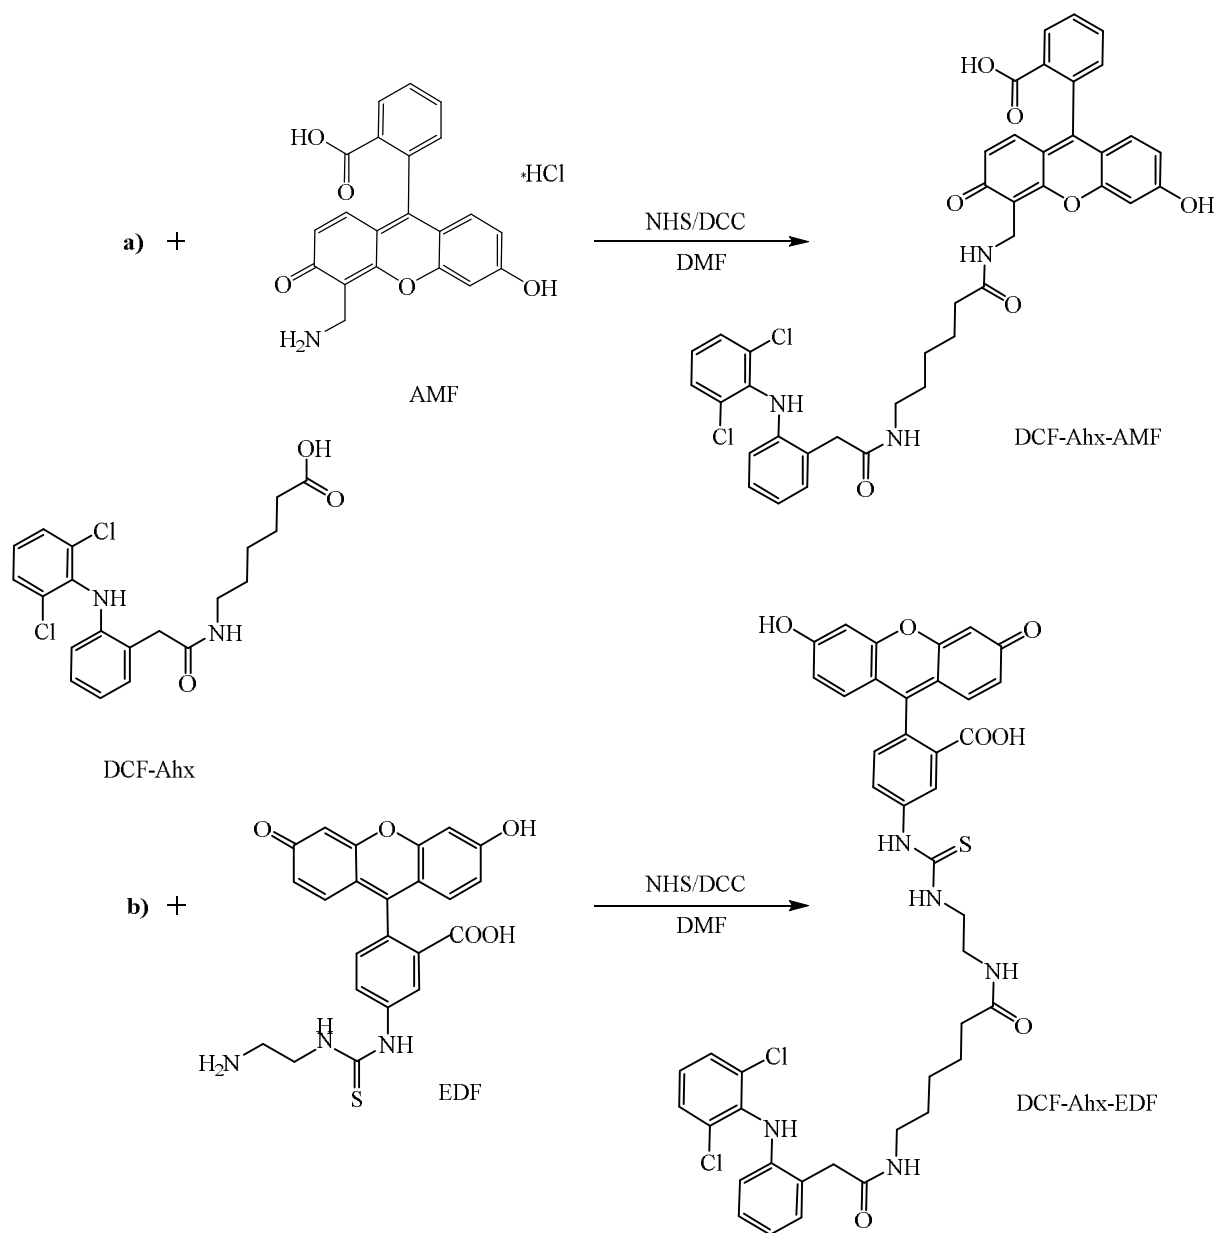

**Fig. S2** Reaction scheme for the synthesis of a) DCF-Ahx-AMF and b) DCF-Ahx-EDF

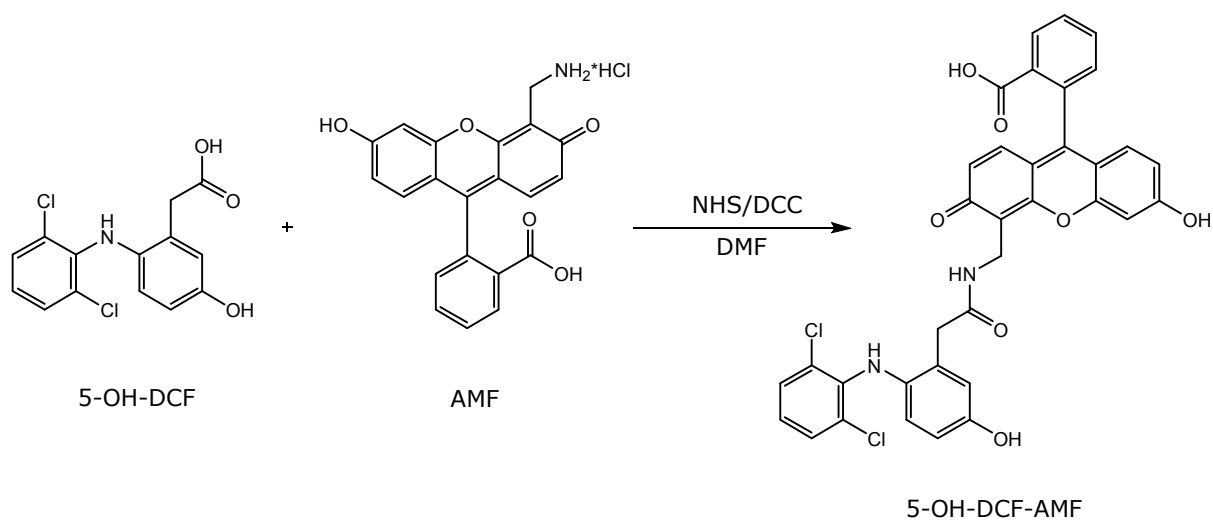

**Fig. S3** Reaction scheme for the synthesis of 5-OH-DCF-AMF

**Table S1**  $R_f$  values of the collected bands of the tracers during purification by TLC

| Tracer                          | DCF-AMF | DCF-Ahx-AMF | DCF-Ahx-EDF | 5-OH-DCF-AMF |
|---------------------------------|---------|-------------|-------------|--------------|
| TLC retardation factor<br>$R_f$ | 0.8     | 0.8         | 0.9         | 0.9          |

Following pages:

**Fig. S4 A)-E)** LC-MS/MS characterization of the products of the four tracer syntheses

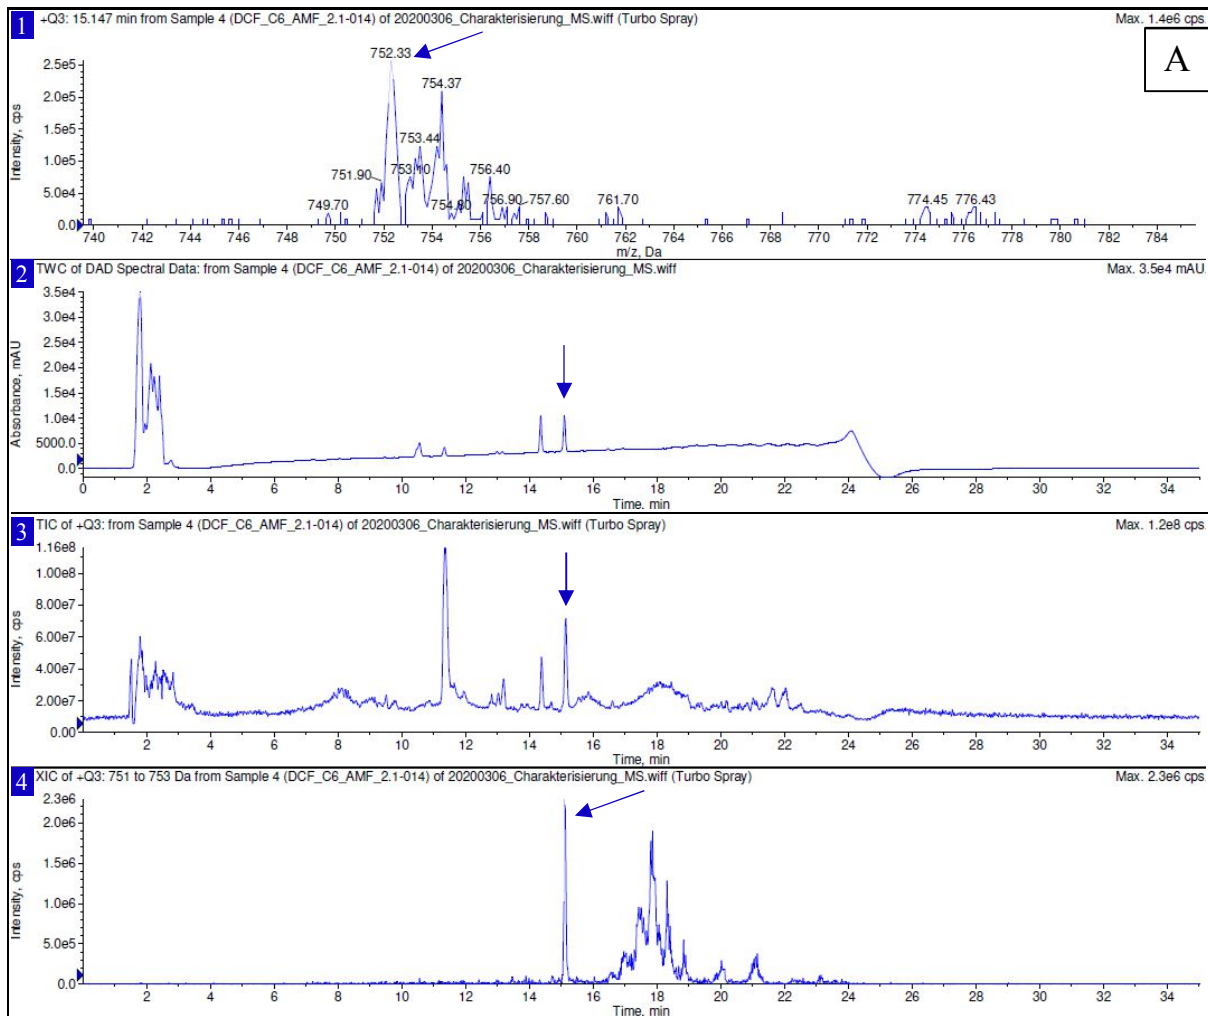

**A) Chromatograms and mass spectra of products of DCF-Ahx-AMF synthesis (before TLC purification):** 1) Mass spectrum of chromatographic peak at RT = 15.147 min (= RT of the largest peak in the DAD trace), with the largest signal at  $m/z = 752.33$  Da. This reflects the mass of the desired product (751.2 g/mol) plus the mass of a proton (+1). 2) HPLC chromatogram, DAD trace, showing, apart from the peak at RT = 15.2 min another one at RT = 14.2 min. 3) TIC (total ion chromatogram) showing the same peaks as the DAD plus a major peak at RT = 11.2 min. 4) Extracted Ion Chromatogram (XIC,  $m/z = 751...753$ ) showing the peak of the desired product at 15.1 min plus impurities in the time range 16.5 ... 21.5 min.

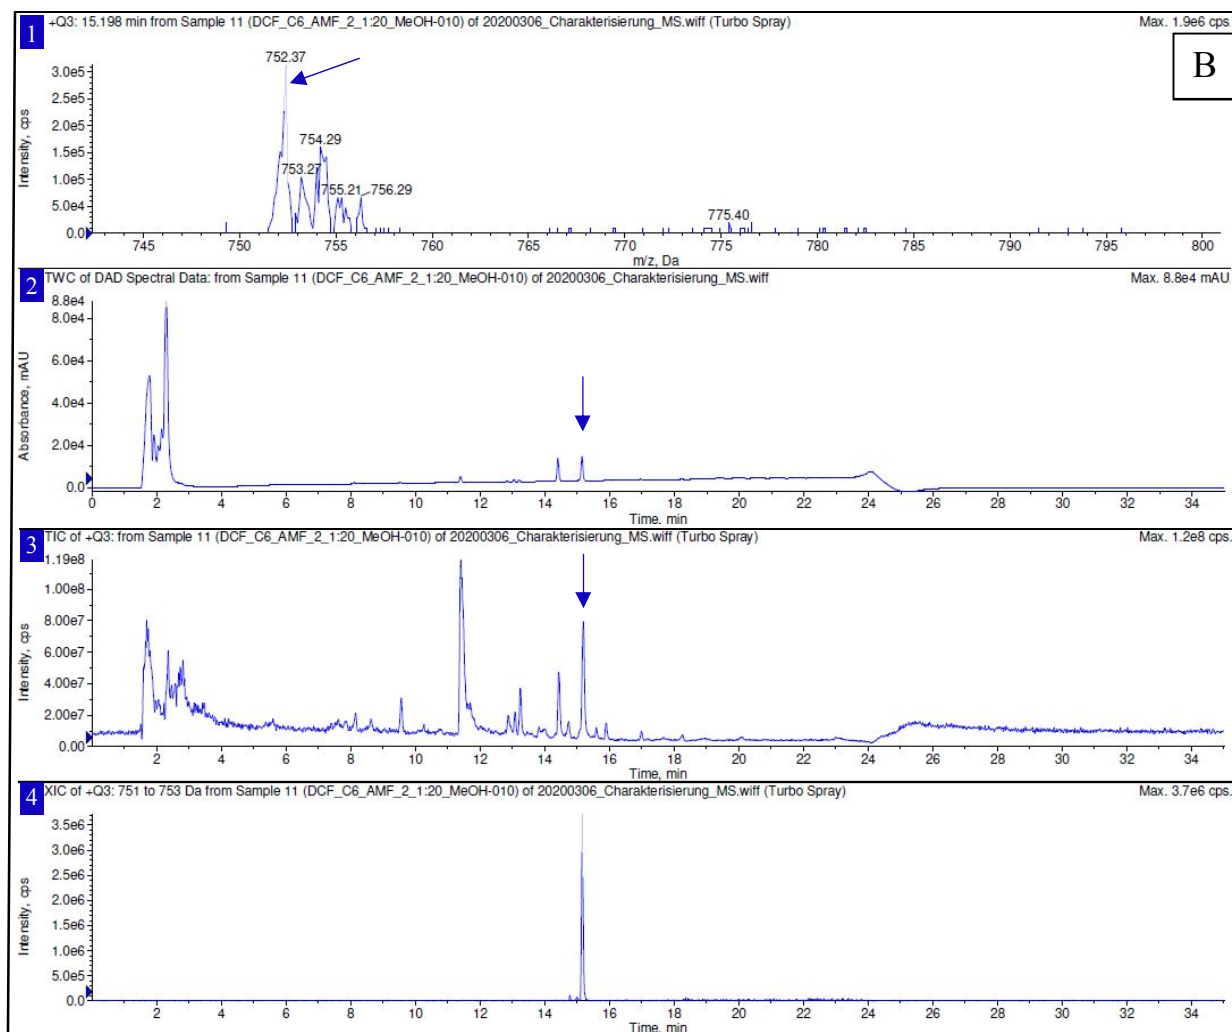

**B)** Chromatograms and mass spectra of products of **DCF-Ahx-AMF** synthesis (after TLC purification). 1) Mass spectrum of chromatographic peak at RT = 15.198 min (= RT of the largest peak in the DAD trace), with the largest signal at  $m/z = 752.37$  Da. This reflects the mass of the desired product (751.2 g/mol) plus the mass of a proton (+1). A small signal at  $m/z = 775.40$  corresponds to the mass of the product plus one sodium ion (+22.9). 2) HPLC chromatogram, DAD trace, showing two peaks, the peak at 15.2 min being the product. 3) TIC chromatogram showing the peak of the desired product at RT = 15.2 min. 4) XIC (ion range 751 ... 753 Da) showing the mass trace of DCF-Ahx-AMF at the correct retention time.

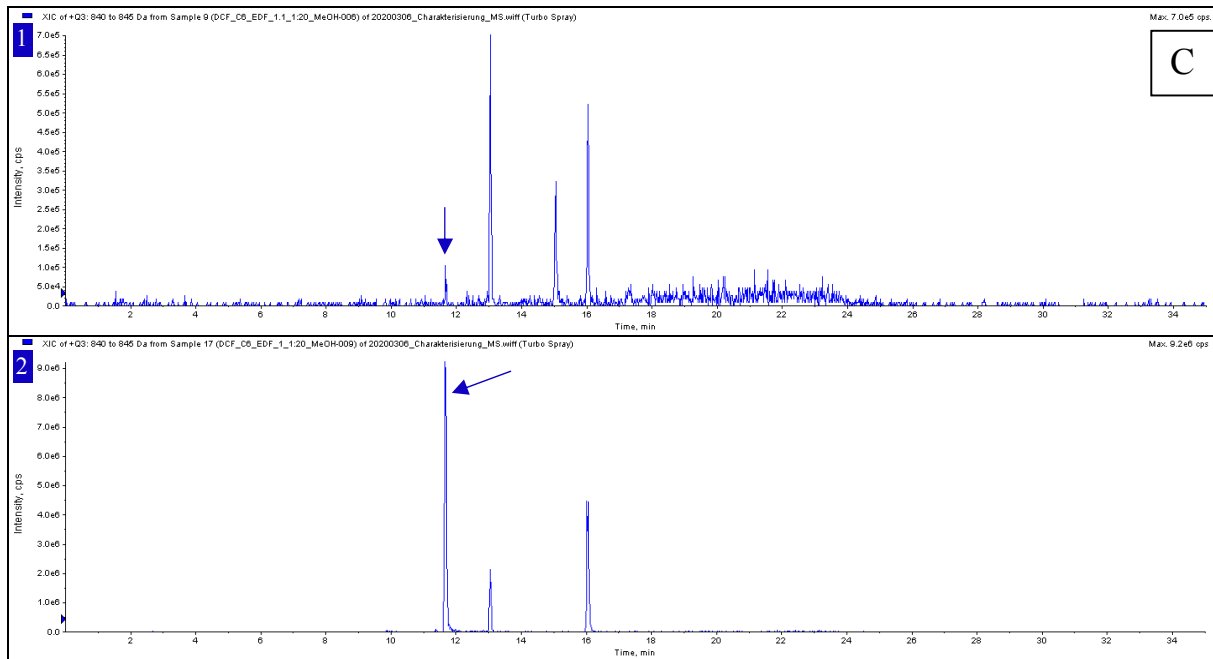

**C) Chromatograms of products of DCF-Ahx-EDF (1) before and (2) after TLC purification:**

1) The XIC chromatogram, constructed from extracted ions in the m/z range of 840 ... 845 (mass of desired product is 839.2 g/mol) shows, besides the peak at RT = 11.9 min, three major impurities that are detected around RT 13, 15 and 16 min. From the relative peak areas it can be assumed that DCF-Ahx-EDF is only a minor component among the products formed.

2) The XIC of the chromatographic run after purification reveals that the desired product is now the main component in the mixture.



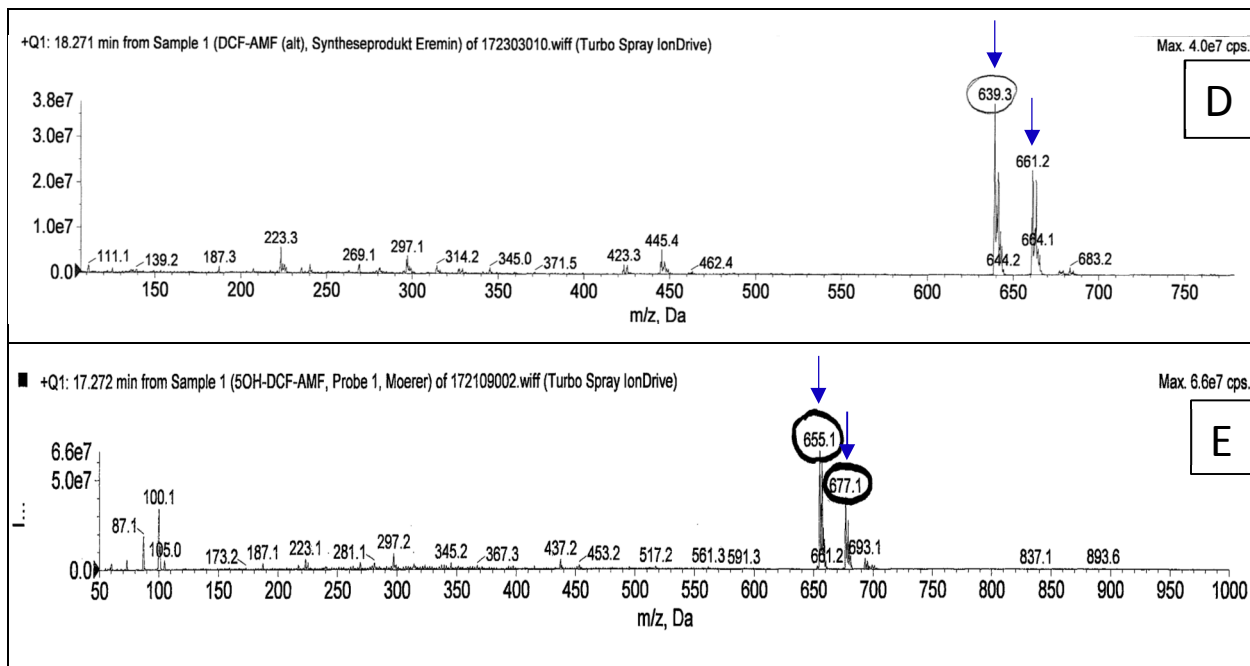

**D)** Synthesis of DCF-AMF: Mass spectrum of chromatographic peak at RT = 18.271 min (= RT of the largest peak in the UV trace), with  $m/z = 639.3$  Da und  $661.2$  Da. This represents the mass of the desired product ( $638.3$  g/mol) plus the mass of one proton (+1) resp. one sodium ion (+22.9). The spectrum shows some minor ions originating from side products.

**E)** Synthesis of 5-OH-DCF-AMF: Mass spectrum of chromatographic peak at RT = 17.272 min (= RT of the largest peak in the UV trace), with two low-intensity signals at  $m/z = 655.1$  Da and  $677.1$  Da. These reflect the masses of the desired product ( $654.1$  g/mol) plus the mass of one proton (+1) resp. one sodium ion (+22.9). The analysis shows that there are no major impurities in the reaction mixture.

### Additional data on real wastewater samples

**Table S2** Total organic carbon content (TOC) and pH of the wastewater samples listed in Table S2

| Sample No. | TOC ( $\text{mg L}^{-1}$ ) | pH  |
|------------|----------------------------|-----|
| 1          | 105                        | 7.6 |
| 2          | 101                        | 7.5 |
| 3          | 111                        | 7.2 |
| 4          | 20.0                       | 7.7 |
| 5          | 26.1                       | 7.1 |
| 6          | 30.2                       | 6.8 |

## References

1. Schmidt S, Hanelt S, Canitz C, Hoffmann H, Garbe LA, Schneider RJ (2017) Synthetic Strategies for the Modification of Diclofenac. *Synlett* 28 (15):1984-1989. <https://doi:10.1055/s-0036-1588858>
2. Bondarenko AP, Eremin SA (2012) Determination of zearalenone and ochratoxin A mycotoxins in grain by fluorescence polarization immunoassay. *J Anal Chem* 67 (9):790-794. <https://doi:10.1134/S1061934812090031>
3. Pourfarzaneh M, White GW, Landon J, Smith DS (1980) Cortisol directly determined in serum by fluoroimmunoassay with magnetizable solid phase. *Clin Chem* 26 (6):730-733
